# Supplementary material for: Two New Species and Two New Records of the Lichen-Forming Fungal Genus Peltula (Ascomycota: Peltulaceae) from China
Source: MDPI journal article supplement (doi:10.3390/biology11101518), 2022-10-17
Supplement: s1 [file s1]

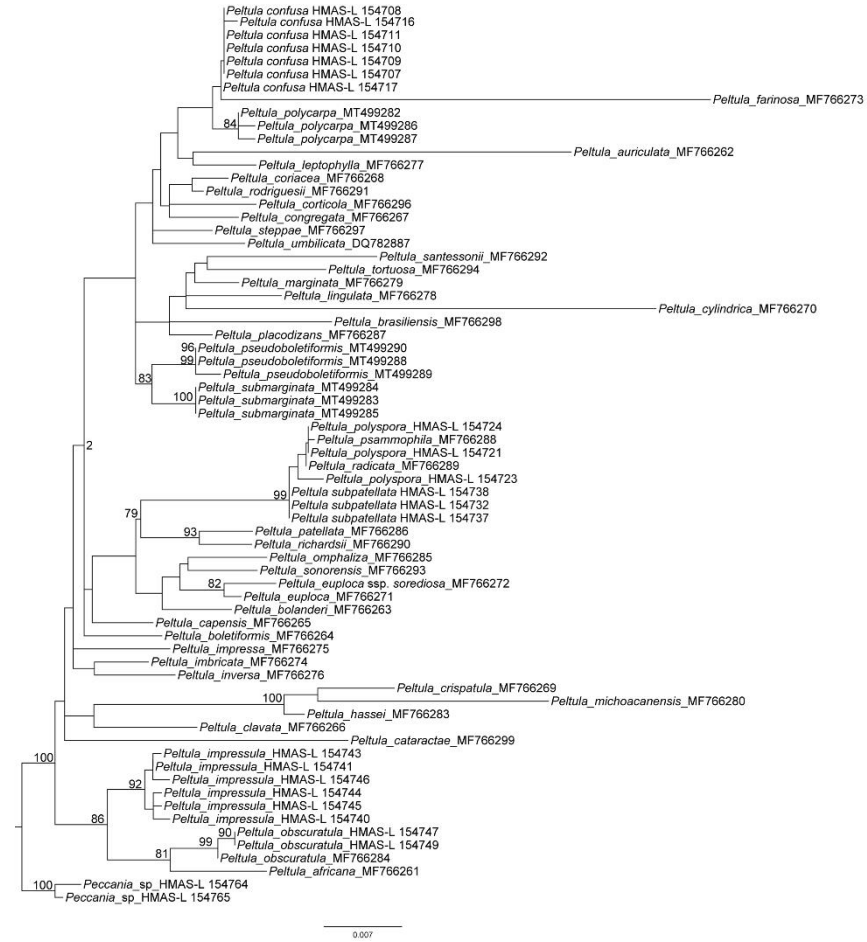

**Figure S1.** The maximum likelihood tree of *Peltula* species based on the nrSSU sequences. The numbers in each node represent bootstrap support (BS). Bootstrap values  $\geq 75$  were plotted on the branches of the RAxML tree. The clades corresponding to the new species and the new records are in bold. Scale = 0.007 substitution per site.

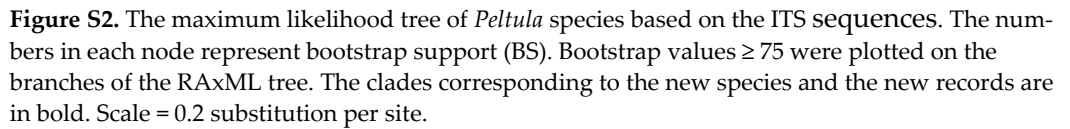

**Figure S2.** The maximum likelihood tree of *Peltula* species based on the ITS sequences. The numbers in each node represent bootstrap support (BS). Bootstrap values  $\geq 75$  were plotted on the branches of the RAxML tree. The clades corresponding to the new species and the new records are in bold. Scale = 0.2 substitution per site.

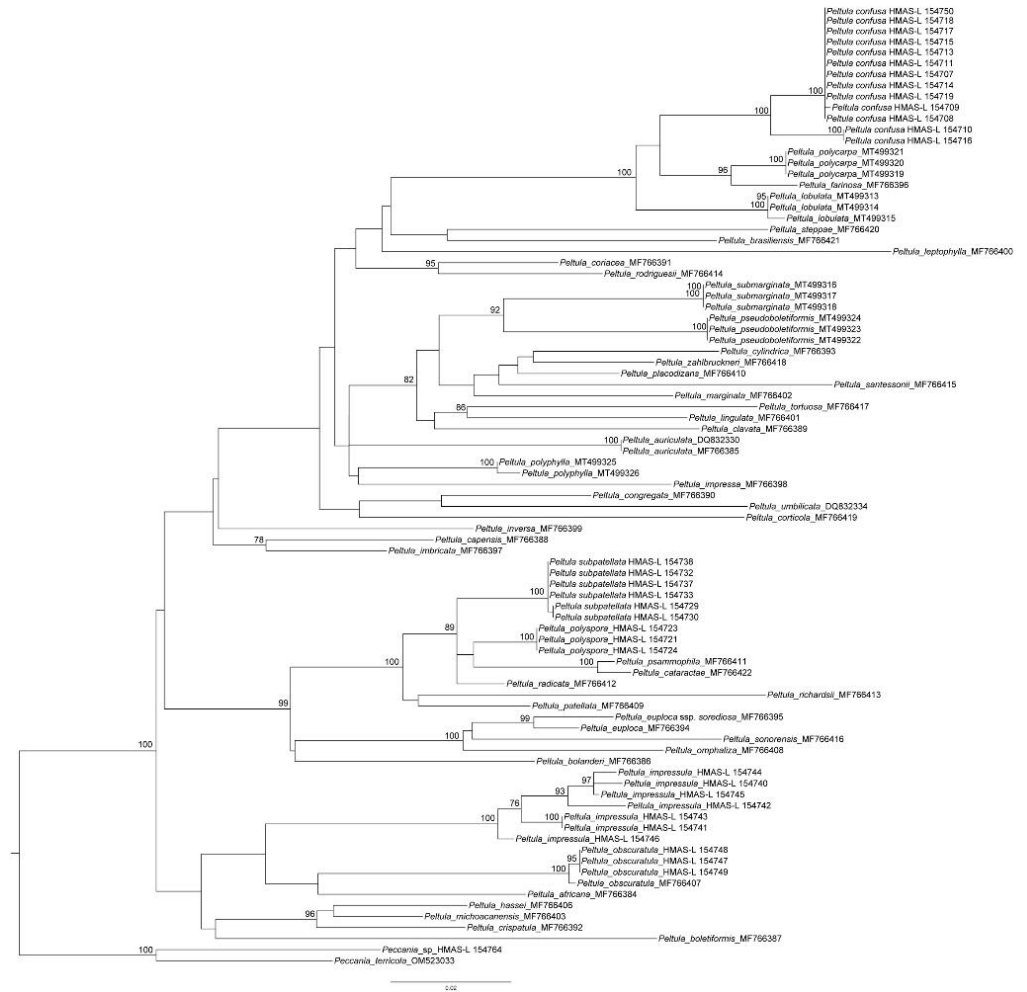

**Figure S3.** The maximum likelihood tree of *Peltula* species based on the nrLSU sequences. The numbers in each node represent bootstrap support (BS). Bootstrap values  $\geq 75$  were plotted on the branches of the RAxML tree. The clades corresponding to the new species and the new records are in bold. Scale = 0.02 substitution per site.

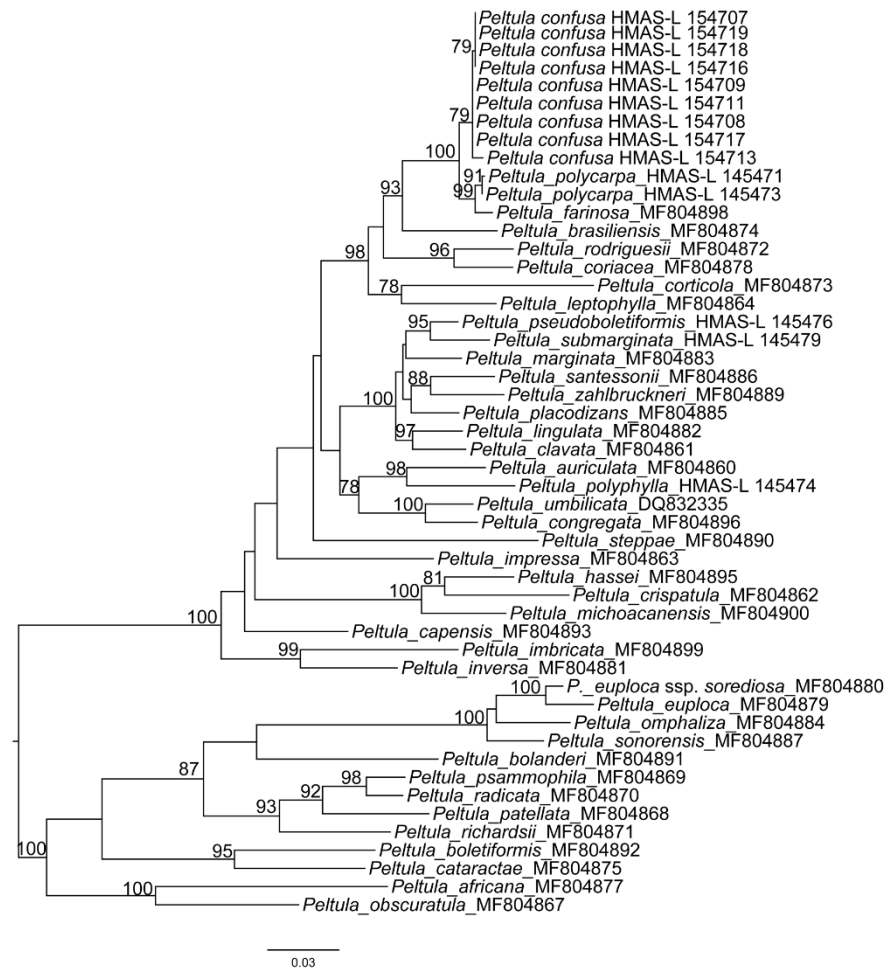

**Figure S4.** The maximum likelihood tree of *Peltula* species based on the RPB2 sequences. The numbers in each node represent bootstrap support (BS). Bootstrap values  $\geq 75$  were plotted on the branches of the RAxML tree. The clades corresponding to the new species and the new records are in bold. Scale = 0.03 substitution per site.

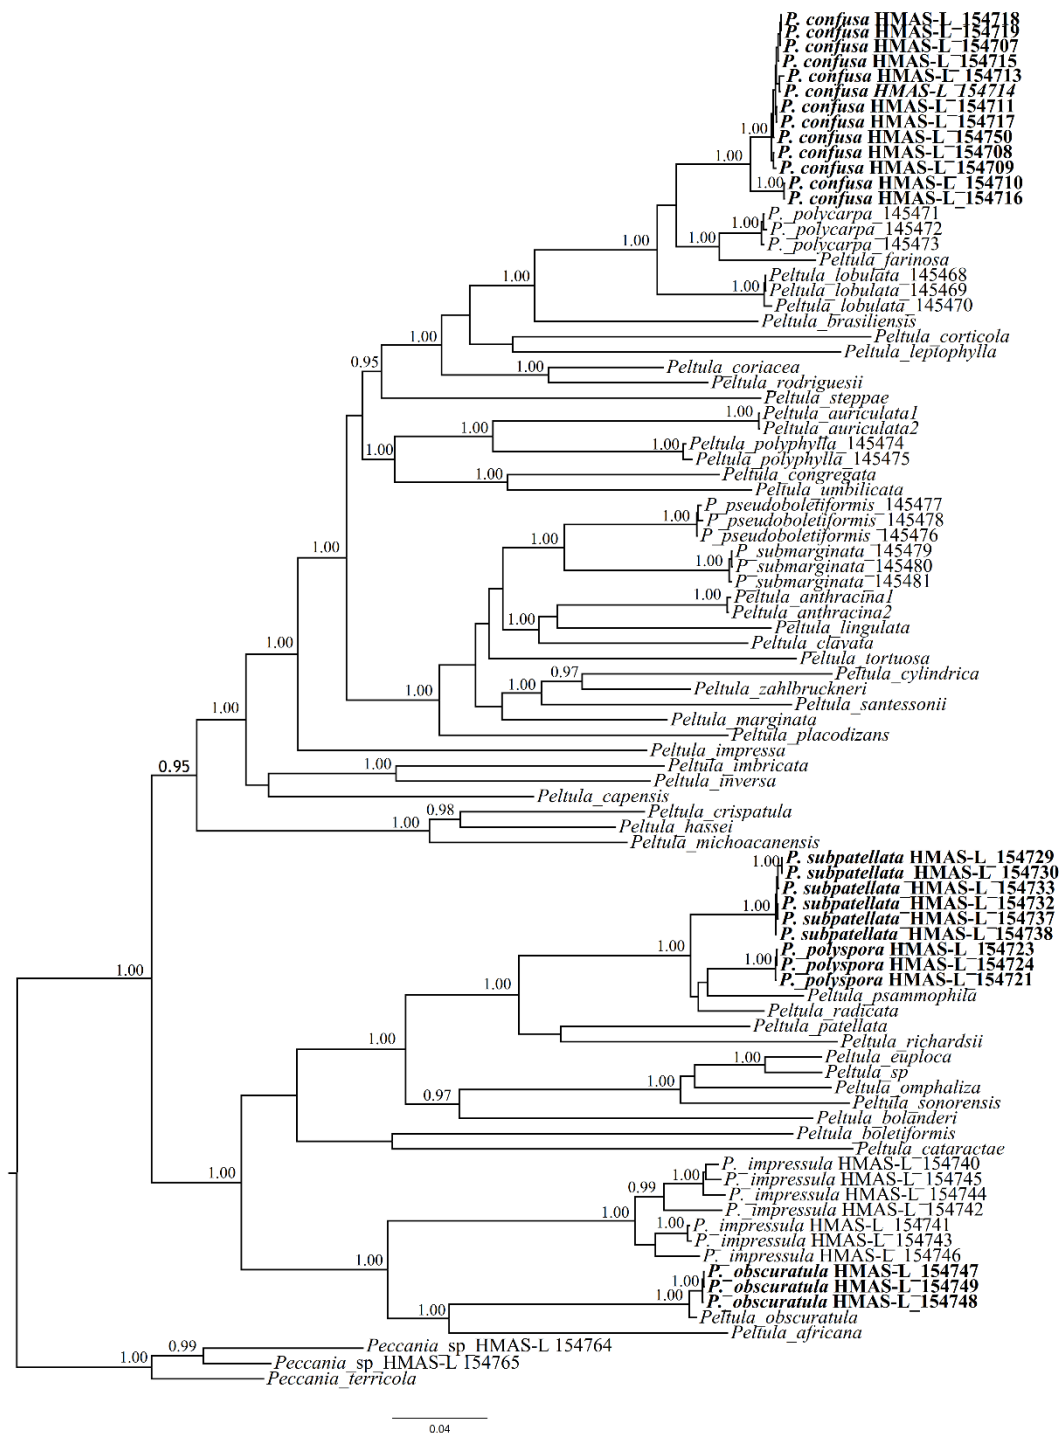

**Figure S5.** The Bayesian tree of *Peltula* species based on the concatenated ITS + nrSSU + nrLSU + RPB2 data set. The numbers in each node represent posterior probability (PP) values. Posterior probability values  $\geq 0.95$  were plotted on the branches of the MrBayes tree. The clades corresponding to the new species and the new records are in bold. Scale = 0.04 substitution per site.
